# Supplementary material
Source: PubMed Central journal article supplement (PMC2856297)
Supplement: supp_M109.077610_jbc.M109.077610-3.pdf [file supp_M109.077610_jbc.M109.077610-3.pdf]

## **SUPPLEMENTARY FIGURES**

**Supplementary Fig. 2. Complete data set of the GO analysis using Ontologizer.** Data sets were analyzed using the gene set provided by Illumina as the background. Analysis for over-represented terms was performed using the term-for-term algorithm with the Benjamini-Hochberg correction, and a corrected p value of 0.05 was used as the cutoff for significance. Colored circles are processes with significant changes. A) Biological process enriched in up-regulated genes. B) Molecular function enriched in up-regulated genes. C) Cellular components enriched in up-regulated genes. D) Biological processes enriched in down-regulated genes. E) Molecular functions enriched in down-regulated genes. F) Cellular components enriched in down-regulated genes.

*See attached PDF file labeled 'Supplementary Fig. 2*

**Supplementary Fig. 3. Graphical representation of the top pathways in the KEGG analysis.** The p value is calculated using the hypergeometric test. Differentially expressed genes that changed more than 1.5-fold are indicated in red. A) PPAR signaling pathway, enriched in down-regulated genes. B) Cell cycle, enriched in up-regulated genes.

A.

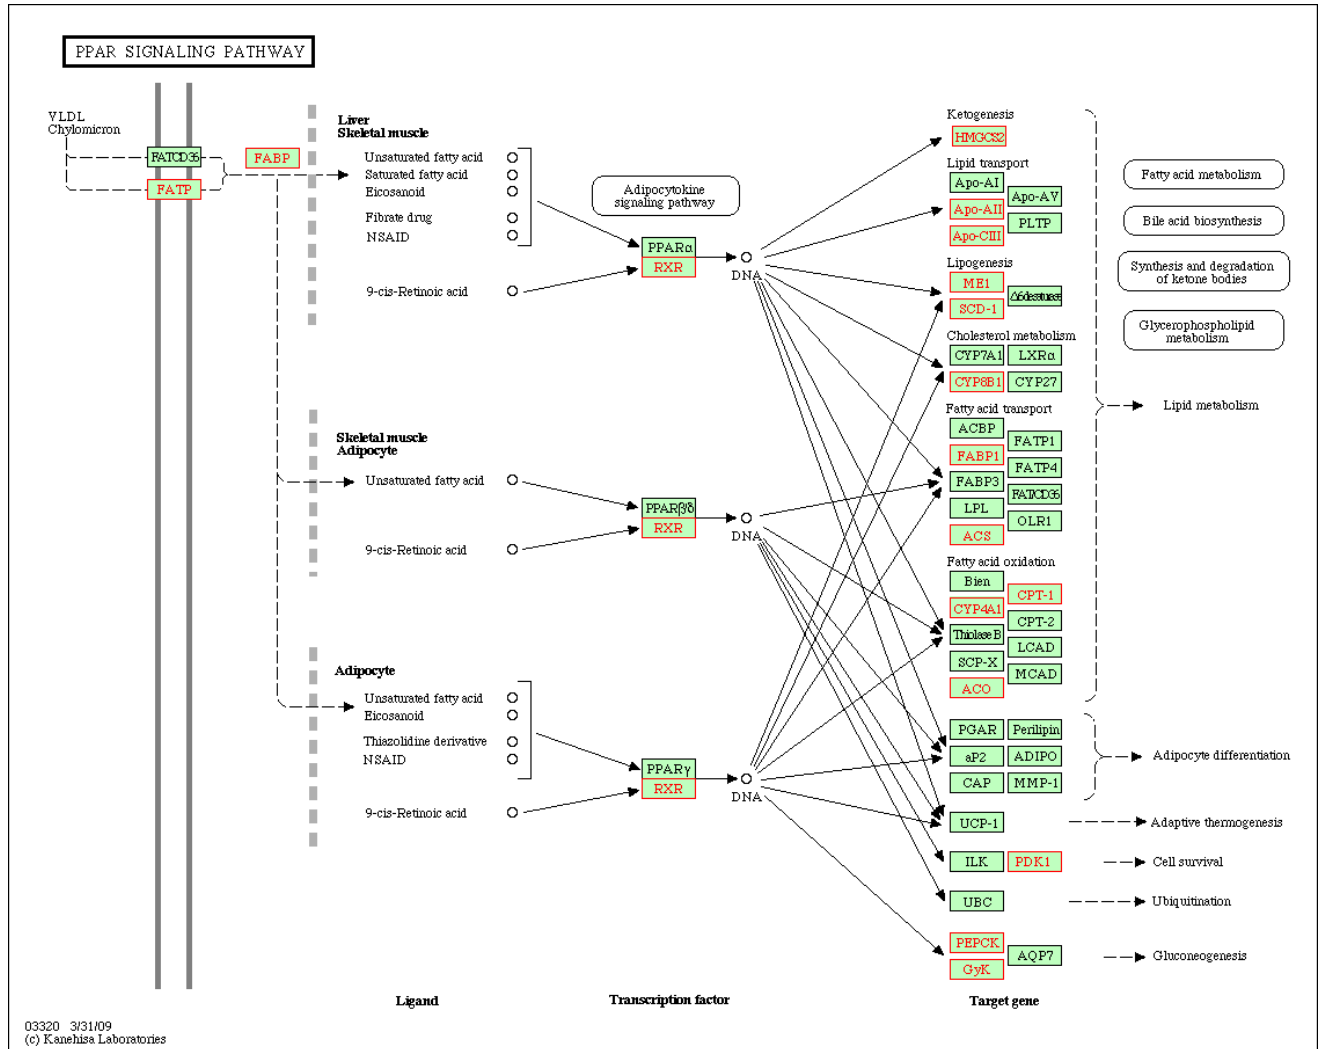

B.

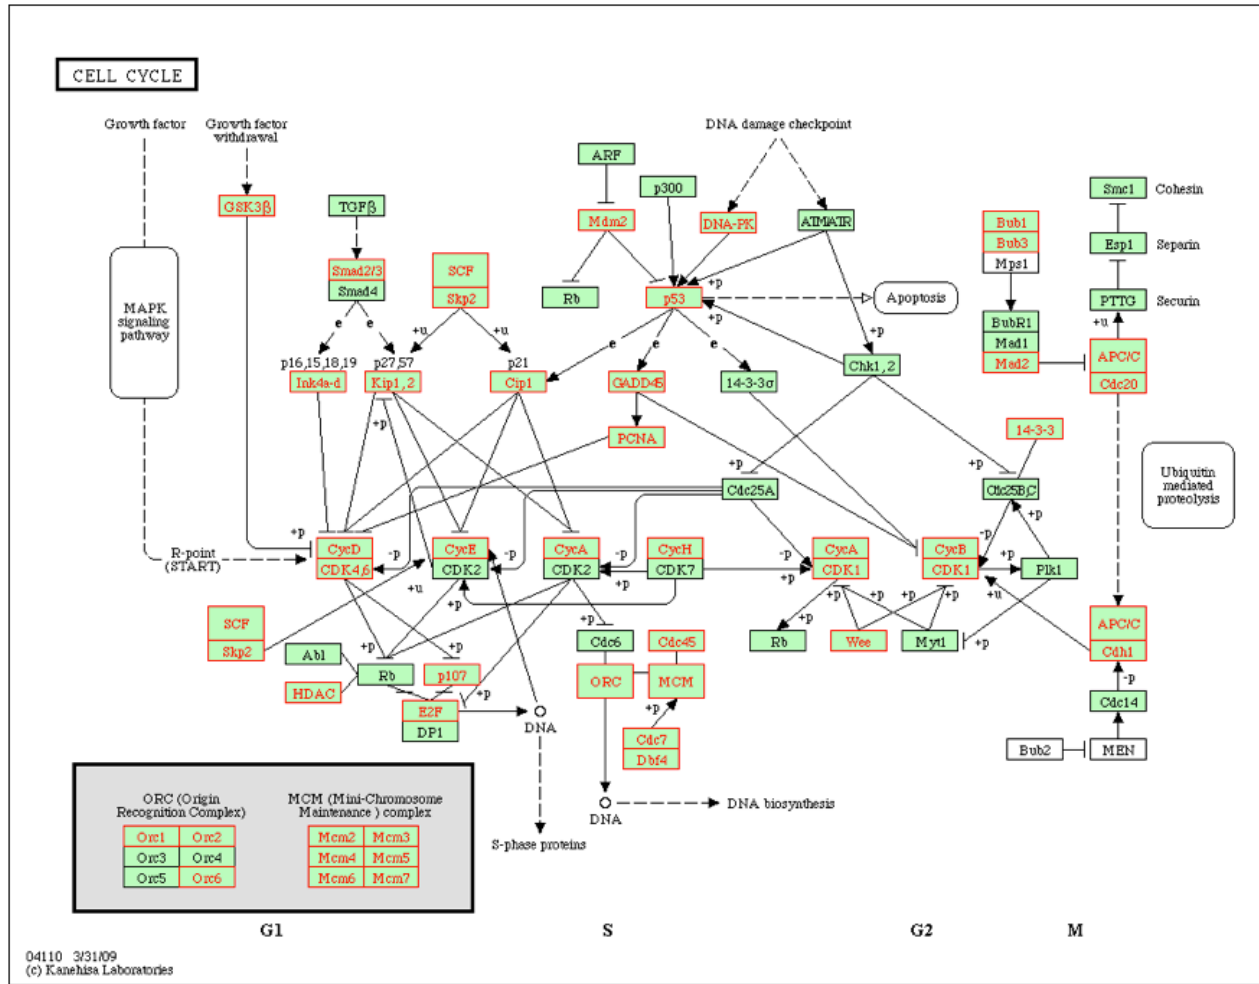

**Supplementary Fig. 4. Graphical representation of the apoptosis pathway.** The apoptosis pathway is presented from Ingenuity Pathway Analysis, with up-regulated genes in red, and down-regulated genes in green.

Apoptosis Signaling

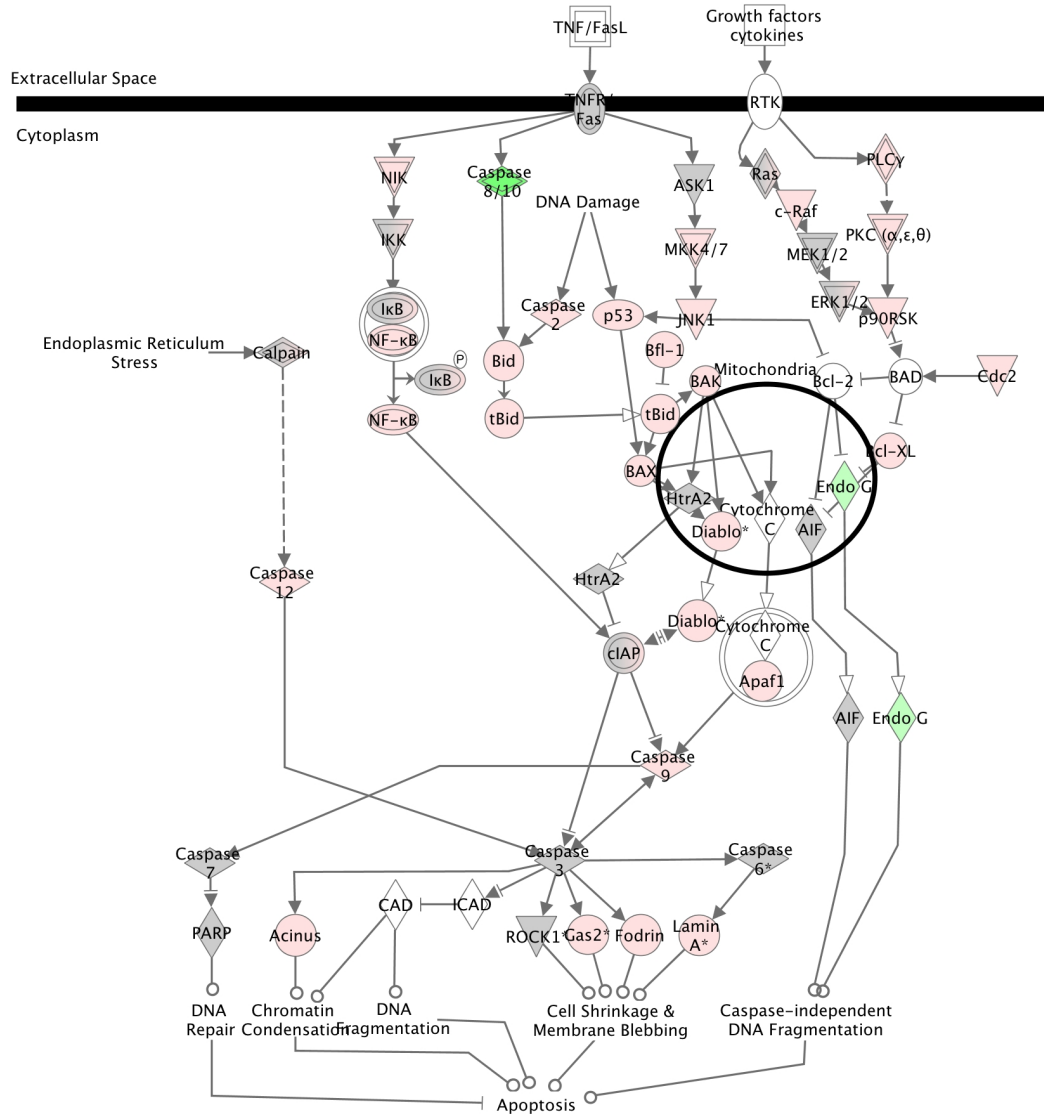

**Supplementary Fig. 5. Graphical view of the genomic locus of *Scd1*.** *Scd1* is located on mouse chr19:44,465,670-44,485,318 (UCSC Genome Browser mm9). There are variable polyA sites, resulting in different lengths of 3' -UTR. There are four different tags that match the transcripts whose accession numbers are circled in red. All but AK135642 show differential expression in the DGE, with BC055453 going up, and AK142630 and the reference sequence going down.

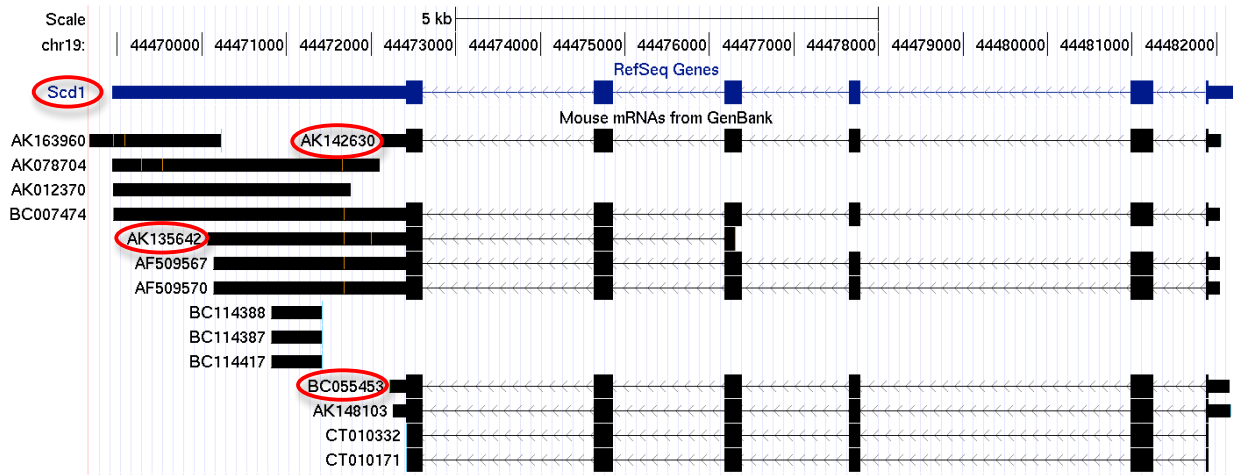

Note that the expression patterns seen in DGE are complex. A classic example is *Scd1*, one of the mouse models chosen for comparison. There are four different tags, each representing an alternative 3' UTR (Supplementary Table 4). The order of UTRs from shortest to longest is: BC055453, AK142630, AK135642, NM\_009127. This also roughly matches the fold changes, which are, respectively 1.6, 2.3, 1.1, and 1.5. The third mRNA, AK135642, does not change, and its annotation is problematic, as it is missing the first few exons of the gene (see above), and is predicted to encode a different protein. There are also very different expression levels, with all except for NM\_009127 in the range of tens of reads, while NM\_009127 is in the thousands of reads (this is also reflected in the corrected p values, Supplementary Table 4.) There are several possible biological explanations for these differences, the two most plausible being i) a mix of tissue types, with different transcripts expressed in different cell types, and ii) different types are expressed by the same cell, but there is one major isoform which decreases, while the minor isoform increases.
