# Supplementary material
Source: PubMed Central journal article supplement (PMC2856297)
Supplement: supp_M109.077610_jbc.M109.077610-5.pdf [file supp_M109.077610_jbc.M109.077610-5.pdf]

**Supplementary Table 2. Attributes of mouse strains used for comparative GO analysis**

| Targeted Gene             | Strain                                     | Sex         | Number of animals |
|---------------------------|--------------------------------------------|-------------|-------------------|
| Scd1 <sup>a</sup>         | SV129 backcrossed 5 generations to C57BL/6 | Female      | 5                 |
| Ppara <sup>b</sup>        | 129/Sv                                     | Female/male | 12/12             |
| Mdr2 (Abcb4) <sup>c</sup> | FVB.129P2-Pgy2 <sup>tm1Bor</sup>           | Male        | 3                 |

- a. Stearoyl-CoA desaturase-1 (Scd1)<sup>-/-</sup> mice, which develop hypoglycemia, hypercholesterolemia and hepatic dysfunction when fed a very low-fat, high-sucrose diet (Scd1 is essential for de novo synthesis of monounsaturated fatty acids) (1) (see Supplementary Fig. 5 for a description of the genomic locus of Scd1).
- b. Peroxisome proliferator activated receptor alpha (Ppara)<sup>-/-</sup> (2), which is involved in regulation of hepatic detoxification, energy homeostasis, and inflammatory responses.
- c. Multi-drug resistance 2 (Abcb4 or Mdr2)<sup>-/-</sup> (3), which have a pronounced liver pathology at three months and develop hepatocellular carcinoma at 12-15 months of age. In all three cases, we compared our DGE data (CerS2 null versus WT) to microarray analyses performed on approximately 3 month-old mice, comparing null to WT (Scd1, Ppara) or heterozygotes (Mdr2) to the DGE data from CerS2 null mice.

1. Flowers, M. T., Keller, M. P., Choi, Y., Lan, H., Kendzierski, C., Ntambi, J. M., and Attie, A. D. (2008) *Physiol Genomics* **33**, 361-372
2. Leuenberger, N., Pradervand, S., and Wahli, W. (2009) *J Clin Invest.* , doi: 10.1172/JCI39019
3. Katzenellenbogen, M., Pappo, O., Barash, H., Klopstock, N., Mizrahi, L., Olam, D., Jacob-Hirsch, J., Amariglio, N., Rechavi, G., Mitchell, L. A., Kohen, R., Domany, E., Galun, E., and Goldenberg, D. (2006) *Cancer Res.* **66**, 4001-4010

**Supplementary Table 3. Overlapping GO terms**

| CerS2 compared to        | Enriched in knock-out mice up-regulated genes                                                                                                                                                                                                                                                                                                                                                                                                                              | Enriched in knock-out mice down-regulated genes                                                                                                                                                                                                                                                                                                                                                                                                                          |
|--------------------------|----------------------------------------------------------------------------------------------------------------------------------------------------------------------------------------------------------------------------------------------------------------------------------------------------------------------------------------------------------------------------------------------------------------------------------------------------------------------------|--------------------------------------------------------------------------------------------------------------------------------------------------------------------------------------------------------------------------------------------------------------------------------------------------------------------------------------------------------------------------------------------------------------------------------------------------------------------------|
| Scd1 (very low fat diet) | <ul style="list-style-type: none"> <li>Cell cycle</li> <li>Intracellular transport</li> <li>Cell division</li> <li>Protein complex assembly</li> <li>Establishment of localization</li> <li>Translation</li> <li>Localization</li> <li>Transport</li> <li>Protein polymerization</li> <li>Establishment of protein localization</li> <li>Endocytosis</li> <li>RNA processing</li> <li>Protein folding</li> <li>DNA replication</li> <li>Biopolymer modification</li> </ul> | <ul style="list-style-type: none"> <li>Generation of precursor metabolites and energy</li> <li>Blood coagulation</li> </ul>                                                                                                                                                                                                                                                                                                                                              |
| PPAR $\alpha$            | -----                                                                                                                                                                                                                                                                                                                                                                                                                                                                      | <ul style="list-style-type: none"> <li>Oxidation reduction</li> <li>Fatty acid metabolic process</li> <li>Cellular lipid metabolic process</li> <li>Lipid metabolic process</li> <li>Monocarboxylic acid metabolic process</li> <li>Carboxylic acid metabolic process</li> <li>Organic acid metabolic process</li> <li>Steroid biosynthetic process</li> <li>Lipid biosynthetic process</li> <li>Vitamin metabolic process</li> <li>Hormone metabolic process</li> </ul> |
| Mdr2                     | <ul style="list-style-type: none"> <li>Immune system process</li> <li>Antigen processing and presentation of peptide antigen</li> <li>Antigen processing and presentation</li> <li>Antigen processing and presentation of exogenous peptide antigen</li> <li>Antigen processing and presentation of exogenous antigen</li> <li>DNA replication initiation</li> <li>DNA-dependent DNA replication</li> <li>Cell cycle</li> <li>Protein complex biogenesis</li> </ul>        | -----                                                                                                                                                                                                                                                                                                                                                                                                                                                                    |

Protein complex assembly  
Antigen processing and  
presentation of exogenous peptide  
antigen via MHC class I  
Anatomical structure formation  
Regulation of protein metabolic  
process  
Regulation of cellular protein  
metabolic process  
DNA replication  
Cellular component organization  
Regulation of cellular component  
organization  
Death  
Positive regulation of endocytosis  
Actin filament-based process  
Regulation of actin  
polymerization or  
depolymerization  
Regulation of actin filament  
length  
Cellular component assembly  
Cell death  
Actin cytoskeleton organization  
Regulation of cellular component  
size  
Regulation of anatomical structure  
morphogenesis  
Programmed cell death  
Phagocytosis, recognition  
Regulation of cell cycle  
Regulation of actin cytoskeleton  
organization  
Apoptosis  
Cell cycle phase  
Regulation of actin filament  
polymerization  
Regulation of actin filament-based  
process  
Cell cycle process  
Mitotic cell cycle  
Actin polymerization or  
depolymerization  
Macromolecular complex  
assembly  
Actin filament organization  
Cell division  
Actin filament polymerization

**Supplementary Table 4. DGE results for the genes used in the comparative expression analysis**

| Gene          | Accession Number | Fold Change | Corrected P-value |
|---------------|------------------|-------------|-------------------|
| Scd1          | NM_009127*       | -1.5240     | 3e-81             |
|               | AK142630         | -2.2539     | 3.42e-5           |
|               | AK135642         | 1.12229     | 0.03633           |
|               | BC055453         | 1.6271      | 0.00311           |
| Ppar $\alpha$ | NM_011144        | **          |                   |
|               | X57638           | **          |                   |
| Mdr2          | NM_008830        | 1.9512      | 1.33e-21          |

\* major transcript

\*\* under limit of detection

For a discussion, see Supplementary Fig. 5
